# Supplementary material
Source: Research Square preprint supplement (doi:10.21203/rs.3.rs-9580700/v1)
Supplement: Supplementary file 1 [file 1cf52cc150c8819c402540ac.docx]

**Table 1:** Patient demographic and clinical factors for those who underwent early (≤1 day) versus delayed (>1 day) video-assisted thoracoscopic surgery (VATS)

|  | **Early VATS**  **n = 386** | **Delayed VATS**  **n = 227** | **p-value** |
| --- | --- | --- | --- |
| Median age, years (IQR) | 16.4 (15.5-17.2) | 16.5 (15.4-17.1) | 0.42 |
| *Sex*, n (%)  Male  Female | 347 (65.2)  39 (48.1) | 185 (34.8)  42 (51.9) | **0.003** |
| *Race*, n (%)  White  Asian  Black  Other/Unknown | 272 (66.0)  41 (65.1)  13 (50.0)  60 (53.6) | 140 (34.0)  22 (34.9)  13 (50.0)  52 (46.4) | **0.05** |
| *Ethnicity,* n (%)  Non-Hispanic  Hispanic  Unknown | 296 (65.6)  58 (59.8)  32 (49.2) | 155 (34.4)  39 (40.2)  33 (50.8) | **0.03** |
| Median BMI percentile (IQR)*  (n = 534) | 20.6 (5.5-46.1) | 20.4 (5.4-43.0) | 0.94 |
| BMI ≥ 30, n (%)  (n = 534) | 6 (1.7) | 1 (0.5%) | 0.24 |
| Asthma, n (%) | 15 (3.9) | 5 (2.2) | 0.26 |
| Chronic Lung Disease, n (%) | 6 (1.6) | 4 (1.8) | 0.85 |
| Oxygen Support, n (%) | 56 (14.5) | 28 (12.3) | 0.45 |
| GI Disease, n (%) | 8 (2.1) | 4 (1.8) | 0.79 |
| Previous Cardiac Surgery, n (%) | 2 (0.5) | 1 (0.4) | 0.89 |
| Minor CRFs, n (%) | 15 (3.9) | 6 (2.6) | 0.41 |
| Steroid use, n (%) | 3 (0.8) | 3 (1.3) | 0.51 |
| Hematologic Disorder, n (%) | 1 (0.3) | 3 (1.3) | 0.12 |
| SIRS, n (%) | 7 (1.8) | 6 (2.6) | 0.49 |
| Past Childhood Malignancy, n (%) | 2 (0.5) | 0 (0.0) | 0.28 |
| *Case Status*, n (%)  Urgent  Emergent | 257 (60.3)  129 (69.0) | 169 (39.7)  58 (31.0) | **0.04** |
| *ASA Class*, n (%)  1  2  3 | 53 (63.1)  248 (64.8)  85 (58.2) | 31 (36.9)  135 (35.2)  61 (41.8) | 0.38 |

*Using 2000 CDC growth charts for the US

IQR = interquartile range, BMI = body mass index, GI = gastrointestinal, CRF = cardiac risk factors, SIRS = systemic inflammatory response syndrome, ASA = American Society of Anesthesiologists
