# Supplementary material
Source: Research Square preprint supplement (doi:10.21203/rs.3.rs-9580700/v1)
Supplement: Supplementary file 2 [file 85c9990a41bde39c050928ff.docx]

**Table 2:** Multivariable logistic regression modelfor delayed (>1 day) video-assisted thoracoscopic surgery (VATS)

| **Characteristic** | **OR (95% CI)** |
| --- | --- |
| *Sex*  Male  Female | Ref.  **2.0 (1.3-3.3)** |
| *Ethnicity*  Non-Hispanic  Hispanic  Other/Unknown | Ref.  1.3 (0.8-2.0)  **2.0 (1.2-3.4)** |

CI = confidence interval, OR = odds ratio
