# Supplementary material
Source: Research Square preprint supplement (doi:10.21203/rs.3.rs-9580700/v1)
Supplement: Supplementary file 3 [file e640c19c85782615a9d415a3.docx]

**Table 3:** 30-day postoperative outcomes between patients undergoing early (≤1 day) versus delayed (>1 day) video-assisted thoracoscopic surgery (VATS)

| **Outcome, n (%)** | **Early VATS**  **n = 386** | **Delayed VATS**  **n = 227** | **p-value** |
| --- | --- | --- | --- |
| Composite morbidity | 4 (1.0) | 0 (0.0) | 0.12 |
| Surgical morbidity | 2 (0.5) | 0 (0.0) | 0.28 |
| Deep SSI | 1 (0.3) | 0 (0.0) | 0.44 |
| Bleeding Requiring Transfusion | 1 (0.3) | 0 (0.0) | 0.44 |
| Non-surgical morbidity | 3 (0.8) | 0 (0.0) | 0.18 |
| Pneumonia | 1 (0,3) | 0 (0.0) | 0.44 |
| Related readmissions | 6 (1.6) | 3 (1.3) | 0.82 |
| Related reoperation | 17 (4.4) | 11 (4.9) | 0.80 |
| Median postoperative LOS, days (IQR) | 3 (3-5) | 3 (3-5) | 0.84 |

IQR= interquartile range, LOS = length of stay, SSI = surgical site infection
